# Supplementary material for: Manumycin A inhibits triple-negative breast cancer growth through LC3-mediated cytoplasmic vacuolation death
Source: PubMed Central journal article supplement — Cell Death Dis. 2013 Jan 17;4(1):e457–. doi: 10.1038/cddis.2012.192 (PMC3563980; doi:10.1038/cddis.2012.192), 2013-01-17
Supplement: cddis2012192x1.pdf [file cddis2012192x1.pdf]

Supplemental Figures:

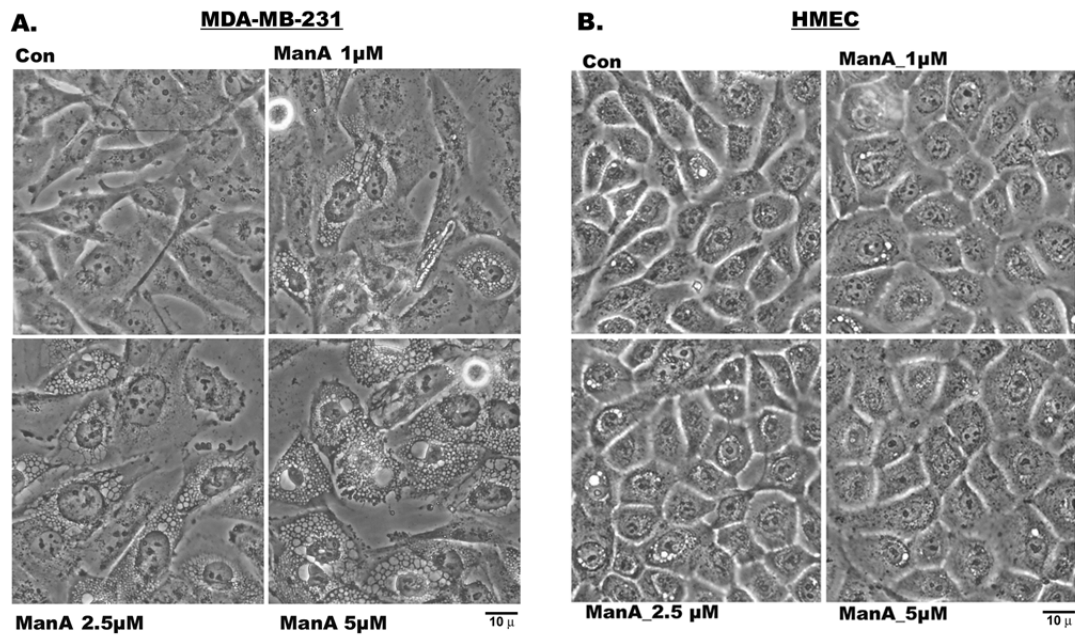

**Supplemental Figure 1:** Phase contrast images of MDA-MB-231 and HMEC cells treated with indicated concentrations of ManA for 9h. A) Dose dependent induction of cytoplasmic vacuolation by ManA in MDA-MB-231 cells. B) Man A failed to induce cytoplasmic vacuolation in HMEC.

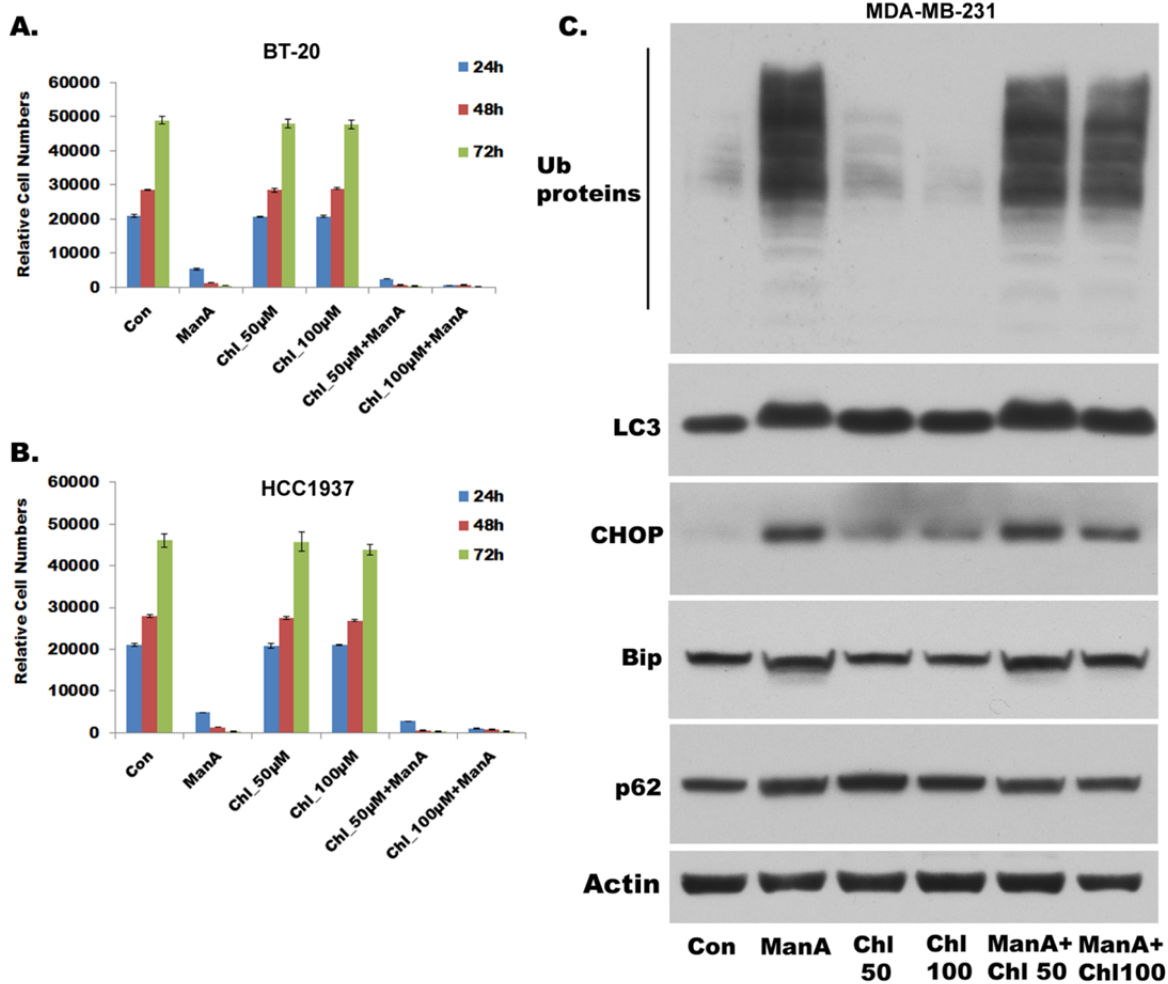

**Supplemental Figure 2:** Failed inhibition of cell death by autophagy inhibitor chloroquine. MTT assay with ManA (5uM), Chloroquine (50uM, 100uM) individually and together in BT-20 (A) and HCC1937 (B) cells at 24h, 48h, 72h. C) Western blots for Bip, p62, CHOP, LC3 and protein ubiquitination in total cell lysates of MDA-MB-231 cells treated with ManA without or with Chloroquine.

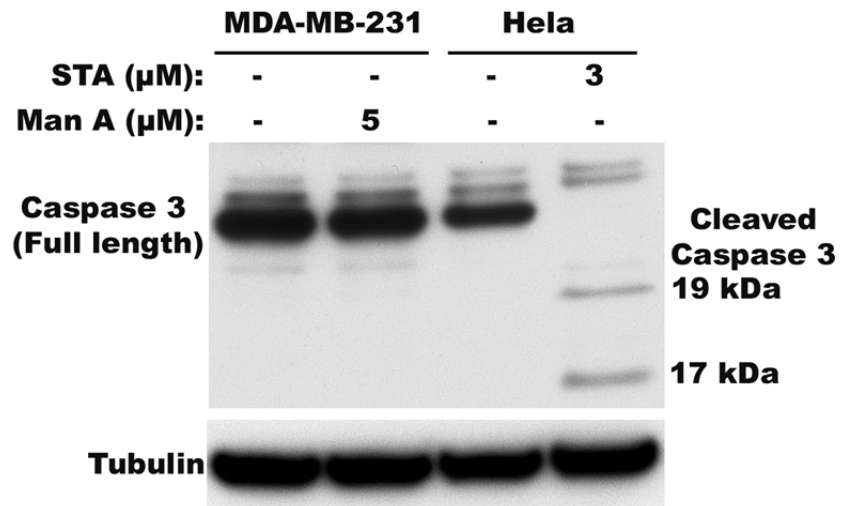

**Supplemental Figure 3:** Western blot of total cell lysates from ManA treated MDA-MB-231 cells and Saturosprin (STA) treated Hela cells with Caspase-3 antibody that recognizes cleaved Caspase3. No cleavage of Caspase-3 was seen in ManA treated MDA-MB-231 cells.

**Con**

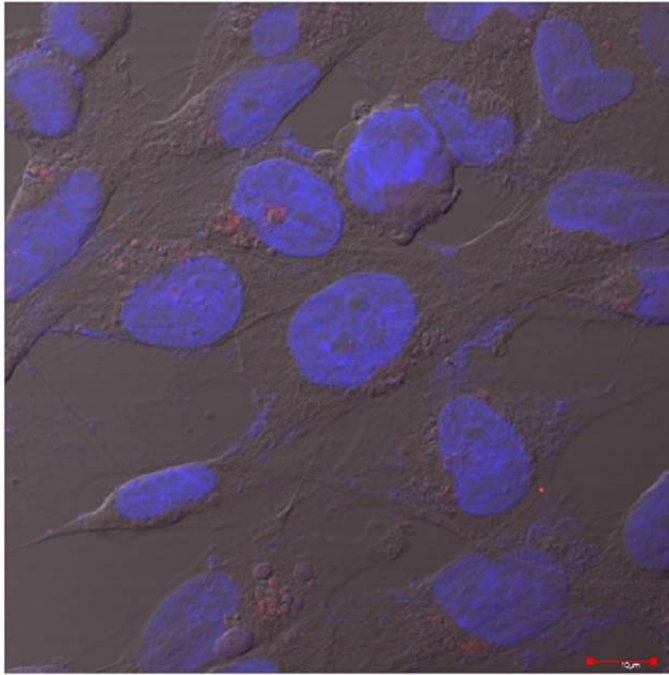

**ManA**

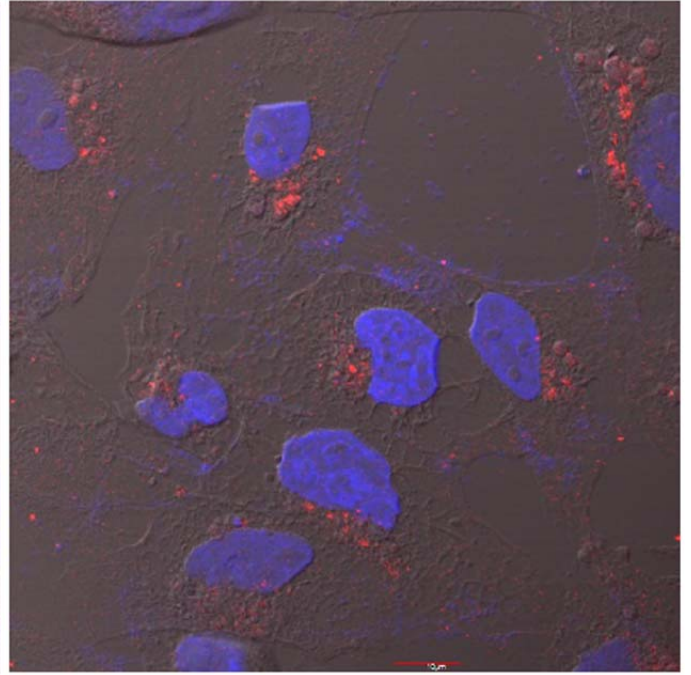

**Supplemental Figure 4:** Confocal images of control (Con) and ManA treated MDA-MB-231 cells using LC3 antibody (red). Nuclei were labeled with DAPI (blue).

**A.**

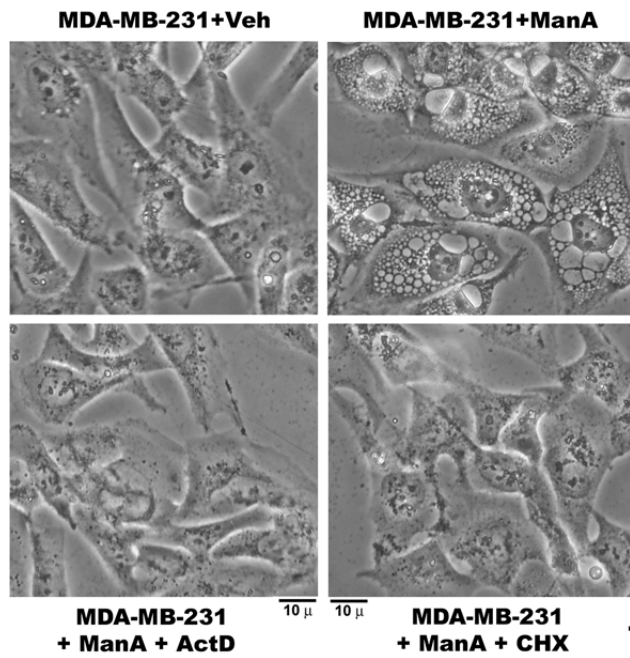

**B.**

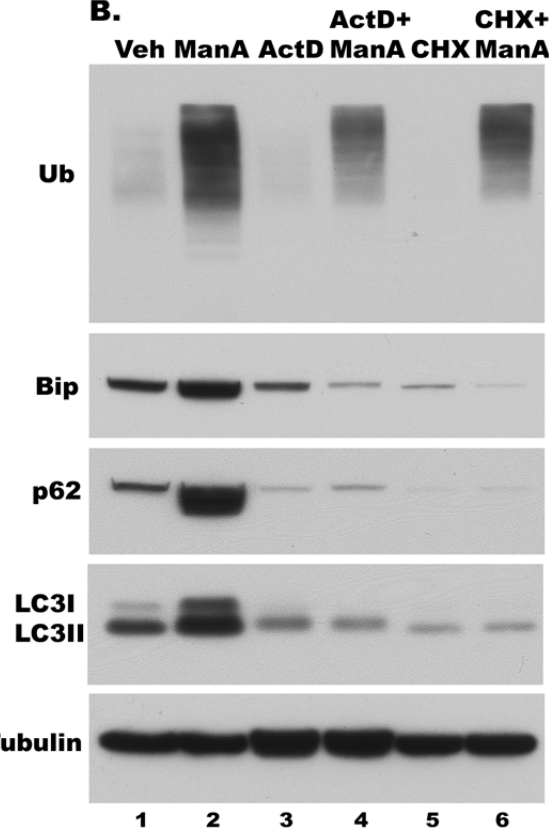

**Supplemental Figure 5:** A) ManA induced cytoplasmic vacuolation in MDA-MB-231 cells is prevented by general transcription and translation inhibitors Actinomycin D (ActD, 8  $\mu$ M) and cycloheximide (CHX, 25  $\mu$ M) respectively. B) Western blots of MDA-MB-231 total cell lysates with ManA treatment for Bip, p62, LC3 and ubiquitinated proteins in the absence and presence of ActD and CHX.

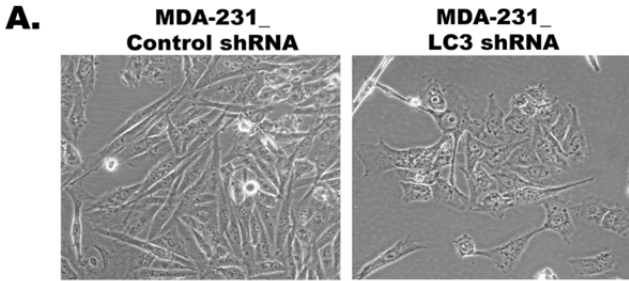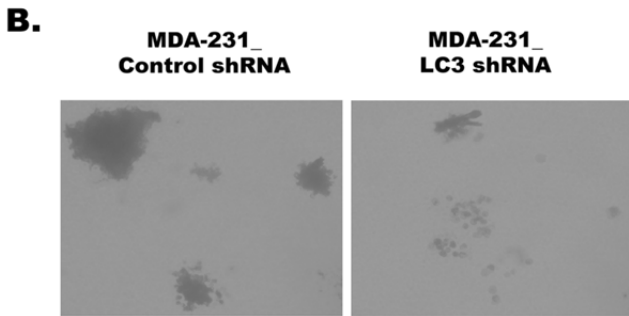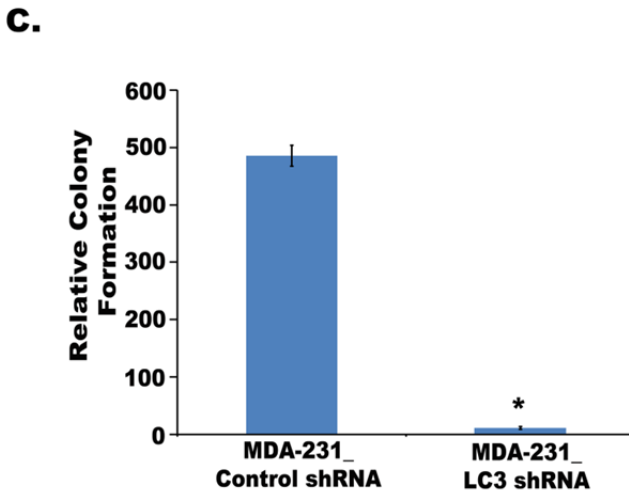

**Supplemental Figure 6:** LC3 knockdown reduced colony formation by MDA-MB-231 cells in soft Agar. A) Phase contrast image control shRNA and LC3shRNA expressing MDA-MB-231 cells. B) Crystal violet stained colonies of control shRNA and LC3 shRNA expressing MDA-MB-231 cells in soft Agar. C) Graphic representation of relative number of colonies formed by MDA-MB-231 cells expressing control shRNA and LC3 shRNA (\*  $p < 0.001$ ).

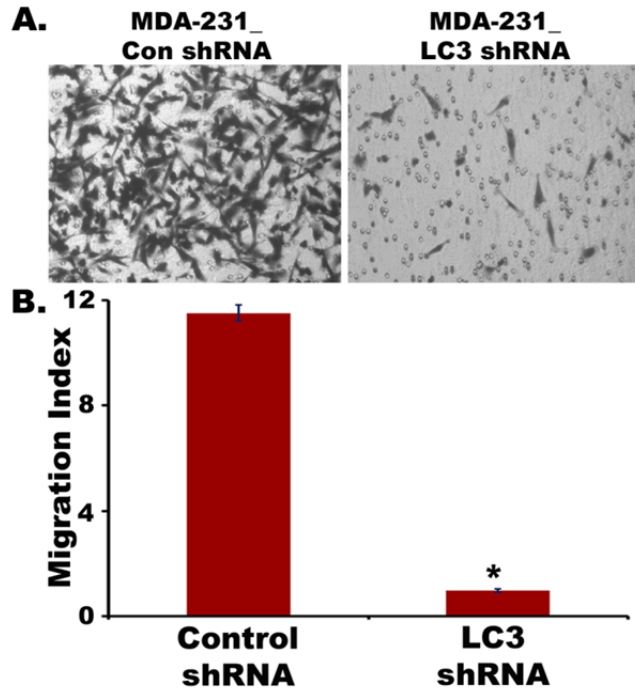

**Supplemental Figure 7:** LC3 deficiency inhibited migration properties of MDA-MB-231 cells. A) Phase contrast images of toluidine blue stained transit well migration assay of con shRNA and LC3 shRNA MDA-MB-231 cells. B) Comparative differences in migration index of MDA-MB-231 cells expressing con shRNA and LC3 shRNA (\*  $p < 0.001$ ).

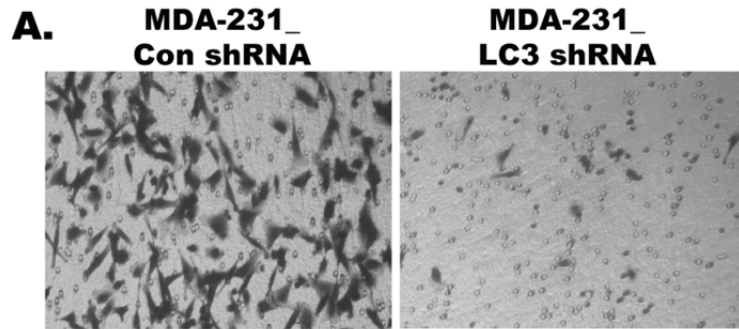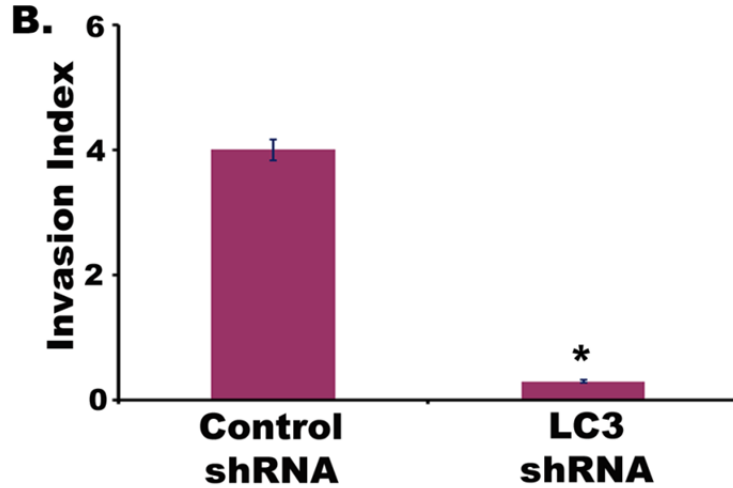

**Supplemental Figure 8:** LC3 deficiency inhibited invasion properties of MDA-MB-231 cells.

A) Toluidine blue stained phase contrast images of MDA-MB-231 cells expressing con shRNA and LC3 shRNA invading through Matrigel coated insert membranes. B) Comparative differences in invasion index of MDA-MB-231 cells expressing con shRNA and LC3 shRNA (\* $p < 0.001$ ).
